# Supplementary material for: New Formyl Phloroglucinol Meroterpenoids from the Leaves of Eucalyptus robusta
Source: PubMed Central journal article supplement (PMC5177953; doi:10.1038/srep39815), 2016-12-22
Supplement: srep39815-s1.pdf [file srep39815-s1.pdf]

## Supporting Information

### **New Formyl Phloroglucinol Meroterpenoids from the Leaves of *Eucalyptus robusta***

Zhi-Chun Shang<sup>+</sup>, Ming-Hua Yang<sup>+</sup>, Rui-Huan Liu, Xiao-Bing Wang, and Ling-Yi Kong\*

State Key Laboratory of Natural Medicines, Department of Natural Medicinal Chemistry, China Pharmaceutical University, 24 Tong Jia Xiang, Nanjing 210009, People's Republic of China.

\*Corresponding author. Tel/Fax: +86-25-83271405. E-mail: [cpu\\_lykong@126.com](mailto:cpu_lykong@126.com)

<sup>+</sup>These authors contributed equally to this work.

## Table of Contents

|                                                                                                                             |           |
|-----------------------------------------------------------------------------------------------------------------------------|-----------|
| <b>Figure S1</b> Calculated and experimental ECD spectra of <b>2</b> and <b>3</b> . .....                                   | <b>4</b>  |
| <b>Figure S2</b> The shielding effects of the benzene ring in <i>S/R-7'</i> of <b>5</b> . .....                             | <b>4</b>  |
| <b>Table S1.</b> Optimized Z-Matrixes of compound <b>2</b> in the Gas Phase (Å) at B3LYP/6-311G (d, 2p) level. ....         | <b>5</b>  |
| <b>Table S2.</b> Optimized Z-Matrixes of compound <b>3</b> in the Gas Phase (Å) at B3LYP/6-311G (d, 2p) level. ....         | <b>6</b>  |
| <b>Figure S3-1</b> HRESIMS of eucalrobosone J ( <b>1</b> ). .....                                                           | <b>9</b>  |
| <b>Figure S3-2</b> <sup>1</sup> H NMR spectrum of eucalrobosone J ( <b>1</b> ) in CDCl <sub>3</sub> . ....                  | <b>9</b>  |
| <b>Figure S3-3</b> <sup>13</sup> C NMR spectrum of eucalrobosone J ( <b>1</b> ) in CDCl <sub>3</sub> . ....                 | <b>10</b> |
| <b>Figure S3-4</b> HSQC spectrum of eucalrobosone J ( <b>1</b> ) in CDCl <sub>3</sub> . ....                                | <b>10</b> |
| <b>Figure S3-5</b> HMBC spectrum of eucalrobosone J ( <b>1</b> ) in CDCl <sub>3</sub> . ....                                | <b>11</b> |
| <b>Figure S3-6</b> <sup>1</sup> H- <sup>1</sup> H COSY spectrum of eucalrobosone J ( <b>1</b> ) in CDCl <sub>3</sub> . .... | <b>11</b> |
| <b>Figure S3-7</b> ROESY spectrum of eucalrobosone J ( <b>1</b> ) in CDCl <sub>3</sub> . ....                               | <b>12</b> |
| <b>Figure S4-1</b> HRESIMS of eucalrobosone K ( <b>2</b> ). .....                                                           | <b>12</b> |
| <b>Figure S4-2</b> <sup>1</sup> H NMR spectrum of eucalrobosone K ( <b>2</b> ) in CDCl <sub>3</sub> . ....                  | <b>13</b> |
| <b>Figure S4-3</b> <sup>13</sup> C NMR spectrum of eucalrobosone K ( <b>2</b> ) in CDCl <sub>3</sub> . ....                 | <b>13</b> |
| <b>Figure S4-4</b> HSQC spectrum of eucalrobosone K ( <b>2</b> ) in CDCl <sub>3</sub> . ....                                | <b>14</b> |
| <b>Figure S4-5</b> HMBC spectrum of eucalrobosone K ( <b>2</b> ) in CDCl <sub>3</sub> . ....                                | <b>14</b> |
| <b>Figure S4-6</b> <sup>1</sup> H- <sup>1</sup> H COSY spectrum of eucalrobosone K ( <b>2</b> ) in CDCl <sub>3</sub> . .... | <b>15</b> |
| <b>Figure S4-7</b> ROESY spectrum of eucalrobosone K ( <b>2</b> ) in CDCl <sub>3</sub> . ....                               | <b>15</b> |
| <b>Figure S5-1</b> HRESIMS of eucalrobosone L ( <b>3</b> ). .....                                                           | <b>16</b> |
| <b>Figure S5-2</b> <sup>1</sup> H NMR spectrum of eucalrobosone L ( <b>3</b> ) in CDCl <sub>3</sub> . ....                  | <b>16</b> |
| <b>Figure S5-3</b> <sup>13</sup> C NMR spectrum of eucalrobosone L ( <b>3</b> ) in CDCl <sub>3</sub> . ....                 | <b>17</b> |
| <b>Figure S5-4</b> HSQC spectrum of eucalrobosone L ( <b>3</b> ) in CDCl <sub>3</sub> . ....                                | <b>17</b> |
| <b>Figure S5-5</b> HMBC spectrum of eucalrobosone L ( <b>3</b> ) in CDCl <sub>3</sub> . ....                                | <b>18</b> |
| <b>Figure S5-6</b> <sup>1</sup> H- <sup>1</sup> H COSY spectrum of eucalrobosone L ( <b>3</b> ) in CDCl <sub>3</sub> . .... | <b>18</b> |
| <b>Figure S5-7</b> ROESY spectrum of eucalrobosone L ( <b>3</b> ) in CDCl <sub>3</sub> . ....                               | <b>19</b> |
| <b>Figure S6-1</b> HRESIMS of eucalrobosone M ( <b>4</b> ). .....                                                           | <b>19</b> |

|                                                                                                                         |           |
|-------------------------------------------------------------------------------------------------------------------------|-----------|
| <b>Figure S6-2</b> $^1\text{H}$ NMR spectrum of eucalrobosone M ( <b>4</b> ) in $\text{CDCl}_3$ . .....                 | <b>20</b> |
| <b>Figure S6-3</b> $^{13}\text{C}$ NMR spectrum of eucalrobosone M ( <b>4</b> ) in $\text{CDCl}_3$ . .....              | <b>20</b> |
| <b>Figure S6-4</b> HSQC spectrum of eucalrobosone M ( <b>4</b> ) in $\text{CDCl}_3$ . .....                             | <b>21</b> |
| <b>Figure S6-5</b> HMBC spectrum of eucalrobosone M ( <b>4</b> ) in $\text{CDCl}_3$ . .....                             | <b>21</b> |
| <b>Figure S6-6</b> $^1\text{H}$ - $^1\text{H}$ COSY spectrum of eucalrobosone M ( <b>4</b> ) in $\text{CDCl}_3$ . ..... | <b>22</b> |
| <b>Figure S6-7</b> ROESY spectrum of eucalrobosone M ( <b>4</b> ) in $\text{CDCl}_3$ . .....                            | <b>22</b> |
| <b>Figure S7-1</b> HRESIMS of eucalrobosone N ( <b>5</b> ). .....                                                       | <b>23</b> |
| <b>Figure S7-2</b> $^1\text{H}$ NMR spectrum of eucalrobosone N ( <b>5</b> ) in $\text{CD}_3\text{OD}$ . .....          | <b>23</b> |
| <b>Figure S7-3</b> $^{13}\text{C}$ NMR of eucalrobosone N ( <b>5</b> ) in $\text{CD}_3\text{OD}$ . .....                | <b>24</b> |
| <b>Figure S7-4</b> HSQC spectrum of eucalrobosone N ( <b>5</b> ) in $\text{CD}_3\text{OD}$ . .....                      | <b>24</b> |
| <b>Figure S7-5</b> HMBC spectrum of eucalrobosone N ( <b>5</b> ) in $\text{CD}_3\text{OD}$ . .....                      | <b>25</b> |
| <b>Figure S7-6</b> ROESY spectrum of eucalrobosone N ( <b>5</b> ) in $\text{CD}_3\text{OD}$ . .....                     | <b>25</b> |
| <b>Figure S8-1</b> HRESIMS of eucalrobosone O ( <b>6</b> ). .....                                                       | <b>26</b> |
| <b>Figure S8-2</b> $^1\text{H}$ NMR spectrum of eucalrobosone O ( <b>6</b> ) in $\text{CDCl}_3$ . .....                 | <b>26</b> |
| <b>Figure S8-3</b> $^{13}\text{C}$ NMR spectrum of eucalrobosone O ( <b>6</b> ) in $\text{CDCl}_3$ . .....              | <b>27</b> |
| <b>Figure S8-4</b> HSQC spectrum of eucalrobosone O ( <b>6</b> ) in $\text{CDCl}_3$ . .....                             | <b>27</b> |
| <b>Figure S8-5</b> HMBC spectrum of eucalrobosone O ( <b>6</b> ) in $\text{CDCl}_3$ . .....                             | <b>28</b> |
| <b>Figure S8-6</b> ROESY spectrum of eucalrobosone O ( <b>6</b> ) in $\text{CDCl}_3$ . .....                            | <b>28</b> |
| <b>Figure S9-1</b> HRESIMS of eucalrobosone P ( <b>7</b> ). .....                                                       | <b>29</b> |
| <b>Figure S9-2</b> $^1\text{H}$ NMR spectrum of eucalrobosone P ( <b>7</b> ) in $\text{CDCl}_3$ . .....                 | <b>29</b> |
| <b>Figure S9-3</b> $^{13}\text{C}$ NMR spectrum of eucalrobosone P ( <b>7</b> ) in $\text{CDCl}_3$ . .....              | <b>30</b> |
| <b>Figure S9-4</b> HSQC spectrum of eucalrobosone P ( <b>7</b> ) in $\text{CDCl}_3$ . .....                             | <b>30</b> |
| <b>Figure S9-5</b> HMBC spectrum of eucalrobosone P ( <b>7</b> ) in $\text{CDCl}_3$ . .....                             | <b>31</b> |
| <b>Figure S9-6</b> ROESY spectrum of eucalrobosone P ( <b>7</b> ) in $\text{CDCl}_3$ . .....                            | <b>31</b> |

**Figure S1** Calculated and experimental ECD spectra of **2** and **3**.



**Figure S2** The shielding effects of the benzene ring in *S/R*-7' of **5**.



**Table S1.** Optimized Z-Matrixes of compound **2** in the Gas Phase (Å) at B3LYP/6-311G (d, 2p) level.

| Center number | Atomic type | Coordinates (Angstroms) |           |           |
|---------------|-------------|-------------------------|-----------|-----------|
|               |             | X                       | Y         | Z         |
| 1             | C           | -5.707524               | 0.612778  | 2.262583  |
| 2             | C           | -5.772108               | -0.716155 | 2.024013  |
| 3             | C           | -4.732677               | -1.381574 | 1.477269  |
| 4             | C           | -3.593286               | -0.719181 | 1.185391  |
| 5             | C           | -3.557976               | 0.626806  | 1.305767  |
| 6             | C           | -4.592007               | 1.280681  | 1.889345  |
| 7             | O           | -6.771706               | 1.222045  | 2.866517  |
| 8             | O           | -4.837184               | -2.707466 | 1.191245  |
| 9             | C           | -2.321944               | -1.414305 | 0.668784  |
| 10            | C           | -1.985445               | -2.836028 | 1.197726  |
| 11            | C           | -1.614898               | -2.949048 | 2.697456  |
| 12            | C           | -2.751292               | -2.613393 | 3.675513  |
| 13            | C           | -2.179505               | -1.186204 | -0.857710 |
| 14            | C           | -1.786381               | 0.246066  | -1.201695 |
| 15            | C           | -2.366354               | 1.452790  | -0.510266 |
| 16            | O           | -2.427474               | 1.295656  | 0.894879  |
| 17            | C           | -0.968002               | -1.919618 | -1.485780 |
| 18            | C           | -0.516348               | -1.068711 | -2.683543 |
| 19            | C           | -0.917368               | 0.306702  | -2.223230 |
| 20            | C           | -3.461370               | -1.567207 | -1.620156 |
| 21            | C           | -0.430606               | 1.573127  | -2.897524 |
| 22            | C           | -1.629167               | 2.440653  | -3.312390 |
| 23            | C           | -2.107430               | 3.336784  | -2.167996 |
| 24            | C           | -1.621045               | 2.761686  | -0.828212 |
| 25            | C           | 0.374685                | 1.251866  | -4.168345 |
| 26            | C           | -0.078842               | 2.688839  | -0.822356 |
| 27            | O           | 0.433803                | 2.302255  | -2.066222 |
| 28            | C           | 0.511340                | 4.088135  | -0.540757 |
| 29            | C           | 0.501573                | 1.777039  | 0.272755  |
| 30            | C           | -1.099359               | -4.370319 | 3.003032  |
| 31            | C           | -6.911223               | -1.393761 | 2.354386  |
| 32            | O           | -7.112164               | -2.577740 | 2.221449  |
| 33            | C           | -4.499398               | 2.631810  | 2.064520  |
| 34            | O           | -5.338501               | 3.359435  | 2.535951  |
| 35            | H           | 6.613329                | 2.105055  | 3.217690  |
| 36            | H           | -4.169762               | -2.931503 | 0.527389  |
| 37            | H           | -1.449335               | -0.871205 | 1.116368  |
| 38            | H           | -1.074776               | -3.200234 | 0.668954  |

|    |   |           |           |           |
|----|---|-----------|-----------|-----------|
| 39 | H | -2.730684 | -3.607445 | 0.923353  |
| 40 | H | -0.772769 | -2.240142 | 2.906213  |
| 41 | H | -2.424923 | -2.753361 | 4.731265  |
| 42 | H | -3.072188 | -1.552361 | 3.593014  |
| 43 | H | -3.632701 | -3.273754 | 3.516548  |
| 44 | H | -3.415652 | 1.560989  | -0.878471 |
| 45 | H | -1.175703 | -2.978151 | -1.759619 |
| 46 | H | -0.115043 | -1.904786 | -0.762827 |
| 47 | H | 0.580160  | -1.175440 | -2.840907 |
| 48 | H | -1.061504 | -1.333040 | -3.617708 |
| 49 | H | -4.327114 | -0.931896 | -1.329185 |
| 50 | H | -3.340680 | -1.450099 | -2.720332 |
| 51 | H | -3.731473 | -2.630143 | -1.428666 |
| 52 | H | -1.372332 | 3.098541  | -4.176187 |
| 53 | H | -2.454070 | 1.779992  | -3.670562 |
| 54 | H | -3.215413 | 3.457882  | -2.193551 |
| 55 | H | -1.699726 | 4.365571  | -2.303882 |
| 56 | H | -1.933345 | 3.500943  | -0.047400 |
| 57 | H | 0.722174  | 2.180570  | -4.675846 |
| 58 | H | -0.232096 | 0.680981  | -4.907363 |
| 59 | H | 1.296631  | 0.670290  | -3.943637 |
| 60 | H | 1.625052  | 4.072619  | -0.557340 |
| 61 | H | 0.201106  | 4.472041  | 0.457508  |
| 62 | H | 0.202992  | 4.842274  | -1.297525 |
| 63 | H | 1.613401  | 1.830897  | 0.298931  |
| 64 | H | 0.264570  | 0.702439  | 0.133498  |
| 65 | H | 0.132103  | 2.075494  | 1.279741  |
| 66 | H | -0.784678 | -4.470494 | 4.066969  |
| 67 | H | -0.214636 | -4.629809 | 2.377905  |
| 68 | H | -1.889133 | -5.131857 | 2.810137  |
| 69 | H | -7.755709 | -0.821277 | 2.795346  |
| 70 | H | -3.572395 | 3.153649  | 1.746073  |

**Table S2.** Optimized Z-Matrixes of compound **3** in the Gas Phase (Å) at B3LYP/6-311G (d, 2p) level.

| Center number | Atomic type | Coordinates (Angstroms) |           |           |
|---------------|-------------|-------------------------|-----------|-----------|
|               |             | X                       | Y         | Z         |
| 1             | C           | 0.328290                | -0.700749 | 2.595669  |
| 2             | C           | -0.370297               | -1.318051 | 1.376941  |
| 3             | C           | -0.148019               | -0.505442 | 0.085697  |
| 4             | C           | 1.367235                | -0.426357 | -0.256509 |
| 5             | C           | 2.320225                | -0.266283 | 0.987592  |
| 6             | C           | 1.525108                | 0.200885  | 2.241666  |

|    |   |           |           |           |
|----|---|-----------|-----------|-----------|
| 7  | C | 1.645902  | 0.510393  | -1.448446 |
| 8  | C | 3.135519  | 0.719098  | -1.707185 |
| 9  | C | 4.019644  | 1.078810  | -0.534080 |
| 10 | C | 3.590184  | 0.605991  | 0.832545  |
| 11 | C | 3.653728  | 2.092038  | 0.532211  |
| 12 | C | 4.843960  | 2.858317  | 1.110264  |
| 13 | C | 2.420257  | 2.969735  | 0.426711  |
| 14 | C | 2.897372  | -1.691361 | 1.271462  |
| 15 | C | 2.360289  | 0.453961  | 3.513159  |
| 16 | C | -3.910416 | 1.910904  | -0.129644 |
| 17 | C | -2.652707 | 1.914723  | 0.374480  |
| 18 | C | -1.826228 | 0.915486  | 0.025232  |
| 19 | C | -2.222247 | -0.056087 | -0.800038 |
| 20 | C | -3.465247 | -0.091147 | -1.308969 |
| 21 | C | -4.310067 | 0.911963  | -0.962160 |
| 22 | O | -4.757397 | 2.915702  | 0.246953  |
| 23 | O | -0.656130 | 0.797086  | 0.382798  |
| 24 | C | -1.064843 | -0.991571 | -1.072473 |
| 25 | O | -3.767101 | -1.106212 | -2.16562  |
| 26 | C | -1.334704 | -2.502791 | -1.154525 |
| 27 | C | -1.359842 | -3.086432 | -2.584868 |
| 28 | C | 0.054925  | -3.179682 | -3.187091 |
| 29 | C | -2.015035 | -4.479033 | -2.580980 |
| 30 | C | -5.584388 | 0.934919  | -1.455016 |
| 31 | O | -6.113385 | 0.131056  | -2.189114 |
| 32 | C | -2.243415 | 2.899084  | 1.229746  |
| 33 | O | -1.170298 | 2.998007  | 1.784970  |
| 34 | H | 0.654116  | -1.520624 | 3.278915  |
| 35 | H | -0.409139 | -0.096388 | 3.178432  |
| 36 | H | -1.459083 | -1.429049 | 1.593595  |
| 37 | H | 0.006873  | -2.355155 | 1.244845  |
| 38 | H | 1.587068  | -1.437365 | -0.688311 |
| 39 | H | 1.101105  | 1.201938  | 1.991402  |
| 40 | H | 1.230437  | 0.081706  | -2.391053 |
| 41 | H | 1.114235  | 1.478495  | -1.366545 |
| 42 | H | 3.275963  | 1.492638  | -2.499931 |
| 43 | H | 3.538767  | -0.239992 | -2.118079 |
| 44 | H | 5.084623  | 1.029662  | -0.800423 |
| 45 | H | 4.384634  | 0.277564  | 1.516951  |
| 46 | H | 4.606180  | 3.212603  | 2.138737  |
| 47 | H | 5.070660  | 3.742508  | 0.472376  |
| 48 | H | 5.768590  | 2.242970  | 1.178120  |
| 49 | H | 1.463319  | 2.435095  | 0.320305  |

|    |   |           |           |           |
|----|---|-----------|-----------|-----------|
| 50 | H | 2.305854  | 3.568623  | 1.358171  |
| 51 | H | 2.532004  | 3.676785  | -0.425889 |
| 52 | H | 2.123546  | -2.473090 | 1.413401  |
| 53 | H | 3.545123  | -2.030970 | 0.430212  |
| 54 | H | 3.530818  | -1.734279 | 2.183800  |
| 55 | H | 3.146755  | 1.225376  | 3.357615  |
| 56 | H | 1.715815  | 0.833608  | 4.339191  |
| 57 | H | 1.715815  | 0.833608  | 4.339191  |
| 58 | H | -5.679487 | 2.778680  | -0.008769 |
| 59 | H | -0.675929 | -0.645968 | -2.055315 |
| 60 | H | -4.604165 | -1.025272 | -2.636493 |
| 61 | H | -0.521472 | -3.066951 | -0.645445 |
| 62 | H | -2.270403 | -2.737640 | -0.597982 |
| 63 | H | -1.967329 | -2.430530 | -3.253507 |
| 64 | H | 0.022601  | -3.581820 | -4.225371 |
| 65 | H | 0.553537  | -2.186574 | -3.238384 |
| 66 | H | 0.708668  | -3.852458 | -2.587184 |
| 67 | H | -2.048117 | -4.913749 | -3.606019 |
| 68 | H | -3.064183 | -4.429632 | -2.209492 |
| 69 | H | -1.453732 | -5.185770 | -1.928484 |
| 70 | H | -6.227146 | 1.791479  | -1.153890 |
| 71 | H | -2.984660 | 3.701481  | 1.450475  |

**Figure S3-1** HRESIMS of eucalrobusone J (**1**).



**Elemental Composition Calculator**

|                                                |                                                  |                     |                  |                 |                    |
|------------------------------------------------|--------------------------------------------------|---------------------|------------------|-----------------|--------------------|
| <b>Target m/z:</b>                             | 453.2648                                         | <b>Result type:</b> | Negative ions    | <b>Species:</b> | [M-H] <sup>-</sup> |
| <b>Elements:</b>                               | C (0-80); H (0-120); O (0-30); N(0-10); Cl (0-5) |                     |                  |                 |                    |
| <b>Ion Formula</b>                             | <b>Calculated m/z</b>                            |                     | <b>PPM Error</b> |                 |                    |
| C <sub>28</sub> H <sub>37</sub> O <sub>5</sub> | 453.2646                                         |                     | -0.24            |                 |                    |

**Figure S3-2** <sup>1</sup>H NMR spectrum of eucalrobusone J (**1**) in CDCl<sub>3</sub>.



**Figure S3-3**  $^{13}\text{C}$  NMR spectrum of eucalrobusone J (**1**) in  $\text{CDCl}_3$ .



**Figure S3-4** HSQC spectrum of eucalrobusone J (**1**) in  $\text{CDCl}_3$ .



**Figure S3-5** HMBC spectrum of eucalrobosone J (**1**) in CDCl<sub>3</sub>.



**Figure S3-6** <sup>1</sup>H-<sup>1</sup>H COSY spectrum of eucalrobosone J (**1**) in CDCl<sub>3</sub>.



**Figure S3-7** ROESY spectrum of eucalrobusone J (**1**) in CDCl<sub>3</sub>.



**Figure S4-1** HRESIMS of eucalrobusone K (**2**).



#### Elemental Composition Calculator

|                                                |                                                  |                     |                  |                 |                    |
|------------------------------------------------|--------------------------------------------------|---------------------|------------------|-----------------|--------------------|
| <b>Target m/z:</b>                             | 467.2437                                         | <b>Result type:</b> | Negative ions    | <b>Species:</b> | [M-H] <sup>-</sup> |
| <b>Elements:</b>                               | C (0-80); H (0-120); O (0-30); N(0-10); Cl (0-5) |                     |                  |                 |                    |
| <b>Ion Formula</b>                             | <b>Calculated m/z</b>                            |                     | <b>PPM Error</b> |                 |                    |
| C <sub>28</sub> H <sub>35</sub> O <sub>6</sub> | 467.2439                                         |                     | 0.41             |                 |                    |

**Figure S4-2**  $^1\text{H}$  NMR spectrum of eucalrobosone K (**2**) in  $\text{CDCl}_3$ .



**Figure S4-3**  $^{13}\text{C}$  NMR spectrum of eucalrobosone K (**2**) in  $\text{CDCl}_3$ .



**Figure S4-4** HSQC spectrum of eucalrobosone K (**2**) in CDCl<sub>3</sub>.



**Figure S4-5** HMBC spectrum of eucalrobosone K (**2**) in CDCl<sub>3</sub>.



**Figure S4-6**  $^1\text{H}$ - $^1\text{H}$  COSY spectrum of eucalrobosone K (**2**) in  $\text{CDCl}_3$ .



**Figure S4-7** ROESY spectrum of eucalrobosone K (**2**) in  $\text{CDCl}_3$ .



**Figure S5-1** HRESIMS of eucalrobusone L (**3**).



**Elemental Composition Calculator**

|                    |                                                  |                     |                  |                 |                    |
|--------------------|--------------------------------------------------|---------------------|------------------|-----------------|--------------------|
| <b>Target m/z:</b> | 453.2650                                         | <b>Result type:</b> | Negative ions    | <b>Species:</b> | [M-H] <sup>-</sup> |
| <b>Elements:</b>   | C (0-80); H (0-120); O (0-30); N(0-10); Cl (0-5) |                     |                  |                 |                    |
| <b>Ion Formula</b> | <b>Calculated m/z</b>                            |                     | <b>PPM Error</b> |                 |                    |
| C28H37O5           | 453.2646                                         |                     | -0.73            |                 |                    |

**Figure S5-2** <sup>1</sup>H NMR spectrum of eucalrobusone L (**3**) in CDCl<sub>3</sub>.



**Figure S5-3**  $^{13}\text{C}$  NMR spectrum of eucalrobosone L (**3**) in  $\text{CDCl}_3$ .



**Figure S5-4** HSQC spectrum of eucalrobosone L (**3**) in  $\text{CDCl}_3$ .



**Figure S5-5** HMBC spectrum of eucalrobosone L (**3**) in CDCl<sub>3</sub>.



**Figure S5-6** <sup>1</sup>H-<sup>1</sup>H COSY spectrum of eucalrobosone L (**3**) in CDCl<sub>3</sub>.



**Figure S5-7** ROESY spectrum of eucalrobusone L (**3**) in CDCl<sub>3</sub>.



**Figure S6-1** HRESIMS of eucalrobusone M (**4**).



#### Elemental Composition Calculator

|                                                |                                                  |                     |                  |                 |                    |
|------------------------------------------------|--------------------------------------------------|---------------------|------------------|-----------------|--------------------|
| <b>Target m/z:</b>                             | 453.2647                                         | <b>Result type:</b> | Negative ions    | <b>Species:</b> | [M-H] <sup>-</sup> |
| <b>Elements:</b>                               | C (0-80); H (0-120); O (0-30); N(0-10); Cl (0-5) |                     |                  |                 |                    |
| <b>Ion Formula</b>                             | <b>Calculated m/z</b>                            |                     | <b>PPM Error</b> |                 |                    |
| C <sub>28</sub> H <sub>37</sub> O <sub>5</sub> | 453.2646                                         |                     | -0.14            |                 |                    |

**Figure S6-2**  $^1\text{H}$  NMR spectrum of eucalrobosone M (**4**) in  $\text{CDCl}_3$ .



**Figure S6-3**  $^{13}\text{C}$  NMR spectrum of eucalrobosone M (**4**) in  $\text{CDCl}_3$ .



**Figure S6-4** HSQC spectrum of eucalrobosone M (**4**) in CDCl<sub>3</sub>.



**Figure S6-5** HMBC spectrum of eucalrobosone M (**4**) in CDCl<sub>3</sub>.



**Figure S6-6**  $^1\text{H}$ - $^1\text{H}$  COSY spectrum of eucalrobosone M (**4**) in  $\text{CDCl}_3$ .



**Figure S6-7** ROESY spectrum of eucalrobosone M (**4**) in  $\text{CDCl}_3$ .



**Figure S7-1** HRESIMS of eucalrobusone N (**5**).



**Elemental Composition Calculator**

|                    |                                                  |                     |                  |                 |                    |
|--------------------|--------------------------------------------------|---------------------|------------------|-----------------|--------------------|
| <b>Target m/z:</b> | 453.2645                                         | <b>Result type:</b> | Negative ions    | <b>Species:</b> | [M-H] <sup>-</sup> |
| <b>Elements:</b>   | C (0-80); H (0-120); O (0-30); N(0-10); Cl (0-5) |                     |                  |                 |                    |
| <b>Ion Formula</b> | <b>Calculated m/z</b>                            |                     | <b>PPM Error</b> |                 |                    |
| C28H37O5           | 453.2646                                         |                     | 0.38             |                 |                    |

**Figure S7-2** <sup>1</sup>H NMR spectrum of eucalrobusone N (**5**) in CD<sub>3</sub>OD.



**Figure S7-3**  $^{13}\text{C}$  NMR spectrum of eucalrobosone N (**5**) in  $\text{CD}_3\text{OD}$ .



**Figure S7-4** HSQC spectrum of eucalrobosone N (**5**) in  $\text{CD}_3\text{OD}$ .



**Figure S7-5** HMBC spectrum of eucalrobosone N (**5**) in CD<sub>3</sub>OD.



**Figure S7-6** ROESY spectrum of eucalrobosone N (**5**) in CD<sub>3</sub>OD.



**Figure S8-1** HRESIMS of eucalrobosone O (**6**) in CDCl<sub>3</sub>.



**Figure S8-2** <sup>1</sup>H NMR spectrum of eucalrobosone O (**6**) in CDCl<sub>3</sub>.



**Figure S8-3**  $^{13}\text{C}$  NMR spectrum of eucalrobosone O (**6**) in  $\text{CDCl}_3$ .



**Figure S8-4** HSQC spectrum of eucalrobosone O (**6**) in  $\text{CDCl}_3$ .



**Figure S8-5** HMBC spectrum of eucalrobosone O (**6**) in CDCl<sub>3</sub>.



**Figure S8-6** ROESY spectrum of eucalrobosone O (**6**) in CDCl<sub>3</sub>.



**Figure S9-1** HRESIMS of eucalrobusone P (**7**) in CDCl<sub>3</sub>.



**Elemental Composition Calculator**

|                    |                                                  |                       |                  |                 |                    |
|--------------------|--------------------------------------------------|-----------------------|------------------|-----------------|--------------------|
| <b>Target m/z:</b> | 467.2441                                         | <b>Result type:</b>   | Negative ions    | <b>Species:</b> | [M-H] <sup>-</sup> |
| <b>Elements:</b>   | C (0-80); H (0-120); O (0-30); N(0-10); Cl (0-5) |                       |                  |                 |                    |
| <b>Ion Formula</b> |                                                  | <b>Calculated m/z</b> | <b>PPM Error</b> |                 |                    |
| C28H35O6           |                                                  | 467.2439              | -0.33            |                 |                    |

**Figure S9-2** <sup>1</sup>H NMR spectrum of eucalrobusone P (**7**) in CDCl<sub>3</sub>.



**Figure S9-3**  $^{13}\text{C}$  NMR spectrum of eucalrobosone P (**7**) in  $\text{CDCl}_3$ .



**Figure S9-4** HSQC spectrum of eucalrobosone P (**7**) in  $\text{CDCl}_3$ .



**Figure S9-5** HMBC spectrum of eucalrobosone P (**7**) in CDCl<sub>3</sub>.



**Figure S9-6** ROESY spectrum of eucalrobosone P (**7**) in CDCl<sub>3</sub>.
